# Supplementary material for: Accounting for Uncertainty in Regional Flow–Ecology Relationships
Source: Atypon-hosted journal article supplement (doi:10.1061/(asce)wr.1943-5452.0001533), 2022-02-15
Supplement: supplemental_material_wr.1943-5452.0001533_morgan.pdf [file supplemental_material_wr.1943-5452.0001533_morgan.pdf]

## SUPPLEMENTAL MATERIALS

*ASCE Journal of Water Resources Planning and Management*

# Accounting for Uncertainty in Regional Flow-Ecology Relationships

Betsy Morgan and Belize Lane

**DOI:** 10.1061/(ASCE)WR.1943-5452.0001533

© ASCE 2022

[www.ascelibrary.org](http://www.ascelibrary.org)

# Supplemental Materials

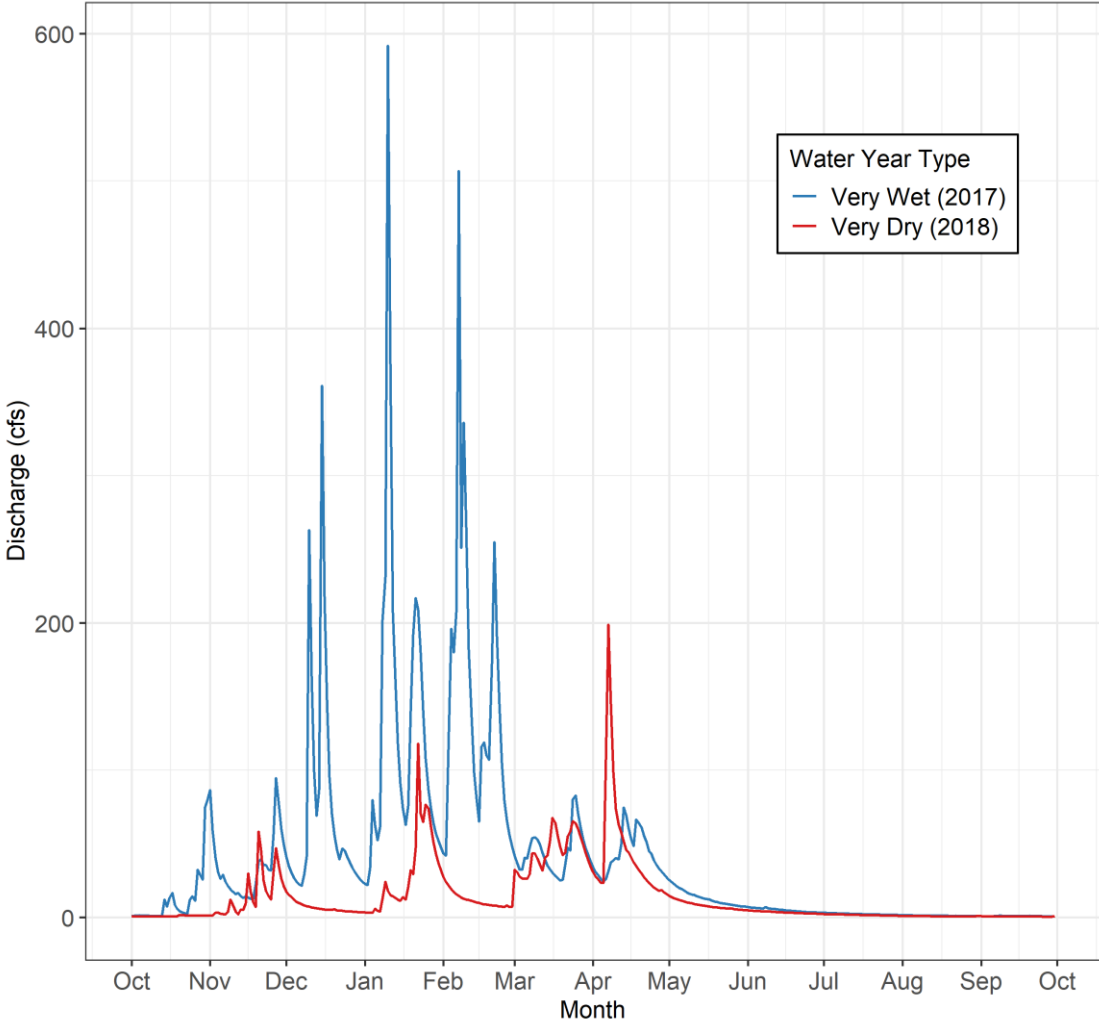

**Figure S1.** Mean daily flow (cfs) for Elder Creek (USGS 11475560) for a Very Wet and Very Dry Water Year Type

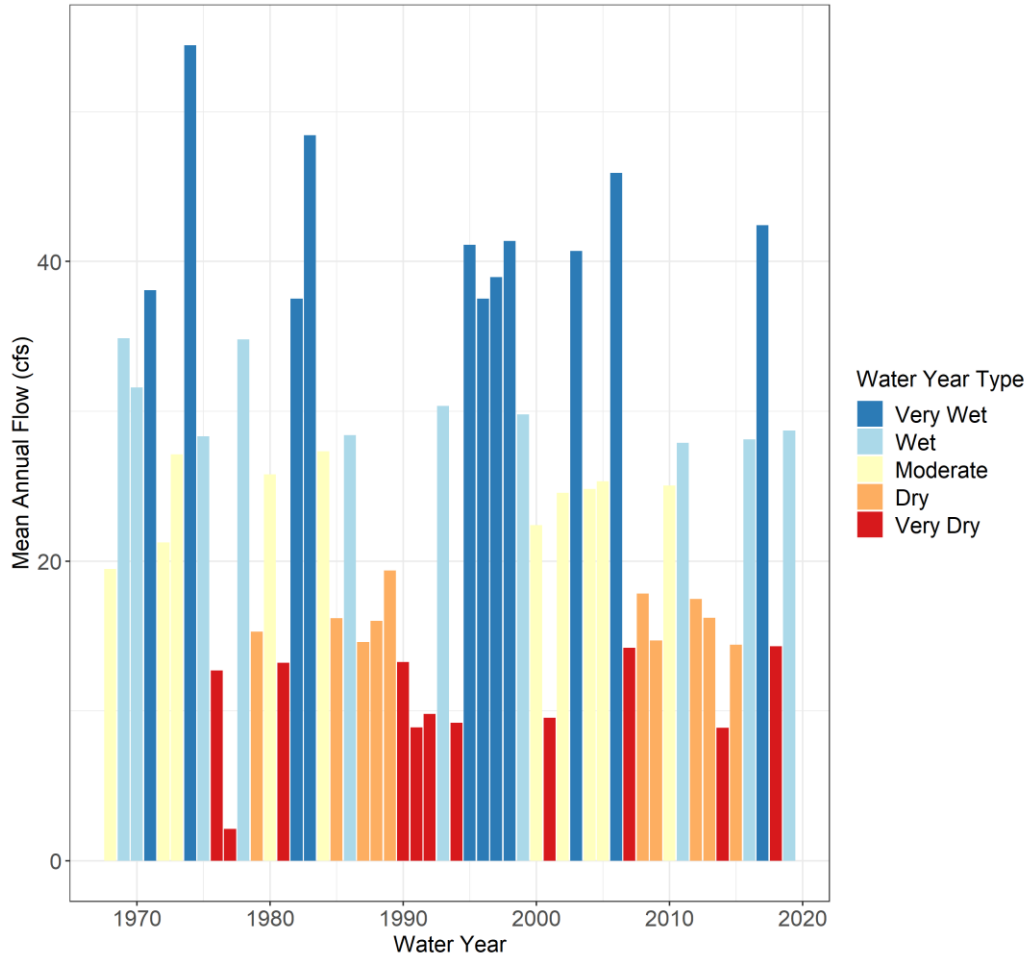

**Figure S2.** Mean annual flow (cfs) of water year types for Elder Creek (USGS 11475560)

# LITERATURE REVIEW PROTOCOL AND CODE DEFINITIONS

Articles will be read in alphabetical order according to author last name. Refer to Table A1 as you are filling out the excel file for a complete list of attribute definitions.

## 1. Fill in metadata attributes

- 1.1. Enter the *title*, *year*, *journal*, and *full citation* for the article.
- 1.2. Enter the *Reference* as FirstAuthorLastNameEtAlYear or LastNameYear. Create a folder in documents>SF Eel>Eco\_lit\_review>GIS\_files with the same reference label.
- 1.3. Assign a *Study\_ID*. This will remain consistent for each entry of the study.
- 1.4. Assign a *Unique\_ID* (e.g., 1, 2, 3) for different entries. Multiple entries may be required for an individual study if:
  - There are multiple relationships for a single location (e.g., a relationship between temperature-FYLF and temperature-Steelhead at a single location)
  - There are different relationships for different locations (e.g., a different relationship between temperature-breeding on the mainstem SFER and Elder Creek). **Note:** If a single relationship is developed from data at multiple locations (e.g., throughout the watershed), use a single entry.
  - There are different relationships for different years (e.g., a different relationship between temperature-breeding for 2008 versus 2010)

## 2. Read/ skim the article

- 2.1. Skim the document to get a sense of spatial and temporal attributes, including study location, date range of data used in the study, and whether these attributes vary over the results presented in the study.
- 2.2. Get a sense of the type of relationship(s) and variables described in the study: Are multiple entries needed?

## 3. Update metadata attributes and categorical relationship attributes

- 3.1. Add however many *unique\_IDs* are required for the study (e.g., if you found 3 unique relationships, there should be 3 unique\_IDs).
- 3.2. For each Unique\_ID, update the following categorical attributes in **excel** and code in **atlas**. These should be the same (for example species in excel is algae, species in atlas is algae). Apply atlas codes to the titles of each document. More than one codes from individual code groups may be applied. A new set of codes should be applied for each Unique\_ID, even if codes are similar.
  - Category of relationship: *Relationship\_category*, *Relationship*
  - Species considered in study: *Species*, *Species*
  - Flow component considered in study: *Flow\_regime*, *flow*
  - Physical condition considered in study: *Physical\_condition*, *physical condition*
  - Lifestage considered in study: *Lifestage\_interaction*, *Lifestage/interaction*

## 4. Fill in temporal attributes for each unique\_ID

- 4.1. Fill in the *start and end dates* of data collected for each relationship (month/day/year)
- 4.2. Fill in the *start and end months* (numeric) of data collected for each relationship (month, e.g., 9 for September)

4.3. Enter the nearest, and most predominant (e.g., likely represents the majority of data), *USGS stream gage used in the study*.

**5. Fill in the spatial attributes for each unique\_ID**

5.1. Denote the *Stream\_reach* by listing the names of creeks, streams, and rivers used in the study (separated by commas).

5.2. After determining the study locations in ArcPro, go to the “Location” sheet and enter the COMID from the stream reaches where data collection occurred (under *GIS COMID* column) and the associated channel type (under *Channel Type* column). There should be a new line entry for each segment. Enter the Unique\_ID and Study\_ID (same as Attributes sheet) for all segment entries.

**6. Denote the findings and methods of each relationship**

6.1. Enter specific details about the study that are not disclosed in the spatial, temporal, or categorical attributes. These include:

- *Variables*: Specific variables within the above categories (e.g., if categorical attributes are peak flow and species, individual variables may be bankfull flow, cladophora, caddisfly)
- *Method description*: Provide a brief description of methods for each unique\_ID

6.2. Provide a short *description of the findings*, including numeric values of importance. Only include the most important and easy to understand finding (e.g., can be easily understood and used by managers).

6.3. For each relationship, note whether it’s *qualitative or quantitative* and provide the *units* of variables in the relationship. Note any *thresholds* derived from the relationship or referenced in the study (e.g., high flow > 500 cfs)

**7. Update metadata**

7.1. Make sure all metadata (e.g., title, citation, reference, etc.) are filled in for each unique\_ID entry.

**Table S1.** Attribute descriptions for SFER literature review

| <b>Attribute</b>         | <b>Description</b>                                                                                                                                                                                                        |
|--------------------------|---------------------------------------------------------------------------------------------------------------------------------------------------------------------------------------------------------------------------|
| Unique_ID                | A unique number to denote different entries in excel. Each line in the excel database needs a unique_ID (e.g., multiple unique_IDs are needed if a study has multiple relationships).                                     |
| Study_ID                 | A unique number to denote different studies in excel. Each study in the excel database needs a unique study_ID. A single study may have multiple unique_IDs, but will only have one study_ID.                             |
| GIS COMID                | A unique GIS specifier to distinguish stream segments in ArcGIS pro                                                                                                                                                       |
| Channel Type             | The channel type of stream segments where data collection occurred (found through the channel type shapefile).                                                                                                            |
| Reference                | Use a consistent in-text citation format as a reference shorthand:<br>Multiple authors: FirstAuthorLastNameEtAlDate (e.g., SuttleEtAl2011), Single author: LastNameDate (e.g., Power2003)                                 |
| Start_date               | Start date of data used in study. Enter in the format: mo-d-yr.                                                                                                                                                           |
| End_date                 | End date of data used in study. Enter in the format: mo-d-yr.                                                                                                                                                             |
| Month_start              | Use to denote seasonality if data collection occurs across multiple years. Enter month in shorthand: Jan, Feb, Mar, etc,                                                                                                  |
| Month_end                | Use to denote seasonality if data collection occurs across multiple years. Enter month in shorthand: Jan, Feb, Mar, etc,                                                                                                  |
| Nearest_USGS             | Enter the name (e.g., Elder) of the nearest USGS gage where data collection occurred                                                                                                                                      |
| Stream_Reach             | Enter the name(s) of the river or stream where data collection occurred.                                                                                                                                                  |
| Relationship_category    | Categorize the relationship as: Flow – species, Flow – physical condition, Physical condition – physical condition, species – species, Physical condition – species, or Species-physical condition. <b>Code in Atlas.</b> |
| Flow_Regime              | Categorize the flow regime according to “flow” codes in Atlas. <b>Code in Atlas.</b> Make a new code if needed.                                                                                                           |
| Species                  | Categorize the species according to “species” codes in Atlas. <b>Code in Atlas.</b> Make a new code if needed.                                                                                                            |
| Lifestage_interaction    | Categorize lifestage according to “lifestage,interaction” codes in Atlas. Entries should be separated by a comma (e.g., juvenile, rearing). <b>Code in Atlas.</b> Make a new code if needed.                              |
| Physical_condition       | Categorize the physical condition according to “physical condition” code in Atlas. <b>Code in Atlas.</b> Make a new code if needed.                                                                                       |
| Method_Description       | Brief description of methods used (e.g., took water samples at 5 transects on Elder Creek, measured algae concentrations at 3 point locations, analyzed with ANOVA)                                                       |
| Variables                | Provide additional specifics of flow regime, species, and physical condition categories (e.g., bankfull flow, cladophora)                                                                                                 |
| Relationship_description | Brief summary (few sentences) of the relationship, including numeric descriptors.                                                                                                                                         |
| Quant_Qual               | Categorize as “Qualitative” or “Quantitative”                                                                                                                                                                             |
| Type_of_Relationship     | Brief overview of relationship (e.g., probabilistic outcome from field data)                                                                                                                                              |
| Units                    | Provide the units used to measure variables (e.g., cfs, cm)                                                                                                                                                               |

|                  |                                                                                                  |
|------------------|--------------------------------------------------------------------------------------------------|
| Threshold/States | Provide thresholds and associated values if provided within study (e.g., high temperature > 24C) |
| Uncertainty      | Rate as 1, 2, 3, or 4 (low to high)                                                              |
| Title            | Full title of the study                                                                          |
| Journal          | Title of Journal where article is published                                                      |
| Year             | Year published                                                                                   |
| Citation         | Full citation (APA)                                                                              |
| Notes            | Miscellaneous notes                                                                              |

## Atlas Code Definitions

**Table S2.** Definition for categorical attribute codes applied in Atlas

| Code Group | Code                | Definition                                                                                                                                                                                                                                                                                                                                                    |
|------------|---------------------|---------------------------------------------------------------------------------------------------------------------------------------------------------------------------------------------------------------------------------------------------------------------------------------------------------------------------------------------------------------|
| Flow       | Dry-season baseflow | Relationship related to summer baseflow (e.g., summer low flow, dry-season baseflow) or any reference to flow during the months of June–October. This code must be used with a flow relationship code (flow – physical condition, flow – species). If possible, use this code with a flow specifier (timing, magnitude, duration, rate of change, frequency). |
| Flow       | Duration            | Flow specifier related to the duration (e.g., 4 weeks, 4 months) of individual flow events or seasonal functional flows within a flow relationship. Must be used with a flow code (e.g., dry-season baseflow).                                                                                                                                                |
| Flow       | Frequency           | Flow specifier related to the frequency (e.g., every 5 years, at least once a year) of individual flow events or seasonal functional flows within a flow relationship. Must be used with a flow code (e.g., dry-season baseflow).                                                                                                                             |
| Flow       | Magnitude           | Flow specifier related to the magnitude (e.g., 50 cfs) of individual flow events or seasonal functional flows within a flow relationship. Must be used with a flow code (e.g., dry-season baseflow).                                                                                                                                                          |
| Flow       | Peak flow           | Relationship related to peak flows (e.g., high winter flows, winter storms, bankfull) or any reference to flow during the months of Nov–March. This code must be used with a flow relationship code (flow – physical condition, flow – species). If possible, use this code with a flow specifier (timing, magnitude, duration, rate of change, frequency).   |
| Flow       | Rate of change      | Flow specifier related to the rate of change (e.g., 200 cfs over 5 days) of individual flow events or seasonal functional flows within a flow relationship. Must be used with a flow code (e.g., dry-season baseflow).                                                                                                                                        |

|                            |                       |                                                                                                                                                                                                                                                                                                                                                                                                                                                                                  |
|----------------------------|-----------------------|----------------------------------------------------------------------------------------------------------------------------------------------------------------------------------------------------------------------------------------------------------------------------------------------------------------------------------------------------------------------------------------------------------------------------------------------------------------------------------|
| Flow                       | Spring recession      | Relationship related to spring recession flows (e.g., spring spates, receding flows, spring flows) or any reference to flow during the months of April–June. This code must be used with a flow relationship code (flow – physical condition, flow – species). If possible, use this code with a flow specifier (timing, magnitude, duration, rate of change, frequency).                                                                                                        |
| Flow                       | Timing                | Flow specifier related to the timing (e.g., early January–Feb) of individual flow events or seasonal functional flows within a flow relationship. Must be used with a flow code (e.g., dry-season baseflow).                                                                                                                                                                                                                                                                     |
| Flow                       | Wet-season initiation | Relationship related to wet-season initiation flows (e.g., fall flush, first high flows) or any reference to flow during the months of Nov–Dec. This code must be used with a flow relationship code (flow – physical condition, flow – species). If possible, use this code with a flow specifier (timing, magnitude, duration, rate of change, frequency).                                                                                                                     |
| Flow                       | Winter-baseflow       | Relationship related to winter baseflows or any reference to non-storm flows during Dec–Mar. This code must be used with a flow relationship code (flow – physical condition, flow – species). If possible, use this code with a flow specifier (timing, magnitude, duration, rate of change, frequency).                                                                                                                                                                        |
| Flow                       | WYT                   | Relationship related to the water year type of the entire flow regime. This code must be used with a flow relationship code (flow – physical condition, flow – species). If possible, use this code with a flow specifier (timing, magnitude, duration, rate of change, frequency).                                                                                                                                                                                              |
| Identity                   | Keep                  | Use as a sorting code to designate article for the SFER flow-ecology literature review                                                                                                                                                                                                                                                                                                                                                                                           |
| Identity                   | Reject                | Use for articles that are not relevant for the SFER flow-ecology literature review. Non-relevant articles include those that do not relate to instream processes including aquatic species, physical conditions, or flow. Articles may also be rejected if they do not collect any original data within the SFER watershed (but reference studies that do) or reference processes beyond the basic understanding of flow-ecology relationships (e.g., carbon flow in food webs). |
| Identity                   | uncertain             | To be used for articles that may be relevant for the literature review, but the coder is uncertain.                                                                                                                                                                                                                                                                                                                                                                              |
| Life stage/<br>interaction | Adult                 | To be used as an adult life stage specifier for aquatic species. Always use with a species code (e.g., steelhead) and a species relationship code (species – species, flow – species, physical condition – species). If possible, use with an interaction specifier (e.g., Breeding, predation).                                                                                                                                                                                 |



|                            |                    |                                                                                                                                                                                                                                                                                                                                                                                                                |
|----------------------------|--------------------|----------------------------------------------------------------------------------------------------------------------------------------------------------------------------------------------------------------------------------------------------------------------------------------------------------------------------------------------------------------------------------------------------------------|
| Life stage/<br>interaction | Breeding           | To be used as an interaction specifier for breeding or reproduction of aquatic species. Always use with a species code (e.g., steelhead) and a species relationship code (species – species, flow – species, physical condition – species). If possible, use with a life stage specifier (e.g., adult, juvenile).                                                                                              |
| Life stage/<br>interaction | Feeding            | To be used as an interaction specifier for feeding interactions between aquatic species. Use with any mention of dietary preferences, feeding patterns, or general food web ecology. Always use with a species code (e.g., steelhead) and a species relationship code (species – species, flow – species, physical condition – species). If possible, use with a life stage specifier (e.g., adult, juvenile). |
| Life stage/<br>interaction | Invasive predation | To be used as an interaction specifier for predation between non-native and native aquatic species. Always use with a species code (e.g., steelhead) and a species relationship code (species – species, flow – species, physical condition – species). If possible, use with a life stage specifier (e.g., adult, juvenile).                                                                                  |
| Life stage/<br>interaction | Juvenile           | To be used as a juvenile life stage specifier for aquatic species. Applies to any reference of juvenile aquatic species, such as a tadpole, fry, etc. Always use with a species code (e.g., steelhead) and a species relationship code (species – species, flow – species, physical condition – species). If possible, use with an interaction specifier (e.g., Breeding, predation).                          |
| Life stage/<br>interaction | Migration          | To be used as an interaction specifier for migrating aquatic species. Always use with a species code (e.g., steelhead) and a species relationship code (species – species, flow – species, physical condition – species). If possible, use with a life stage specifier (e.g., adult, juvenile).                                                                                                                |
| Life stage/<br>interaction | Rearing            | To be used as an interaction specifier for rearing aquatic species. Always use with a species code (e.g., Steelhead) and a species relationship code (species – species, flow – species, physical condition – species). If possible, use with a life stage specifier (e.g., adult, juvenile).                                                                                                                  |
| Life stage/<br>interaction | Seed               | To be used as a seed life stage specifier for aquatic or riparian vegetation. Always use with a species code (e.g., vegetation) and a species relationship code (species – species, flow – species, physical condition – species).                                                                                                                                                                             |
| Life stage/<br>interaction | Seedling           | To be used as a seedling life stage specifier for aquatic or riparian vegetation (e.g., young plant). Always use with a species code (e.g., vegetation) and a species relationship code (species – species, flow – species, physical condition – species).                                                                                                                                                     |

|                    |                 |                                                                                                                                                                                                                                                                                                                                                                                                                             |
|--------------------|-----------------|-----------------------------------------------------------------------------------------------------------------------------------------------------------------------------------------------------------------------------------------------------------------------------------------------------------------------------------------------------------------------------------------------------------------------------|
| Physical Condition | Depth           | Relationship related to the depth of water in a stream or river. This code must always be used whenever a physical condition relationship code is used (e.g., physical condition – species, physical condition – physical condition, flow – physical condition).                                                                                                                                                            |
| Physical Condition | Dimensionless   | Relationship related to dimensionless parameters of physical conditions (e.g., scaling relationships). This code must always be used whenever a physical condition relationship code is used (e.g., physical condition – species, physical condition – physical condition, flow – physical condition).                                                                                                                      |
| Physical Condition | General habitat | Relationship related to more than 3 physical habitat conditions, such as velocity, depth, light, etc. Use this code when physical habitat assessments are performed for a species and include multiple physical conditions. This code must always be used whenever a physical condition relationship code is used (e.g., physical condition – species, physical condition – physical condition, flow – physical condition). |
| Physical Condition | Geomorphic      | Relationship related to geomorphic features that are specific to a certain channel type (e.g., channel slope, contributing area). This code may also be used in reference to relationships that vary by location. This code must always be used whenever a physical condition relationship code is used (e.g., physical condition – species, physical condition – physical condition, flow – physical condition).           |
| Physical Condition | Light           | Relationship related to the amount of light entering a stream or river, or in reference to the amount of shade. This code must always be used whenever a physical condition relationship code is used (e.g., physical condition – species, physical condition – physical condition, flow – physical condition).                                                                                                             |
| Physical Condition | Nutrients       | Relationship related to instream nutrients (e.g., nitrogen, phosphorus). This code must always be used whenever a physical condition relationship code is used (e.g., physical condition – species, physical condition – physical condition, flow – physical condition).                                                                                                                                                    |
| Physical Condition | Sediment        | Relationship related to instream sediment (e.g., fine sediment, boulders, sediment transport). This code must always be used whenever a physical condition relationship code is used (e.g., physical condition – species, physical condition – physical condition, flow – physical condition).                                                                                                                              |
| Physical Condition | Shear stress    | Relationship related to shear stress experienced in streams and rivers. This code can be applied to any mention of erosion or scour. This code must always be used whenever a physical condition relationship code is used (e.g., physical condition – species, physical condition – physical condition, flow – physical condition).                                                                                        |

|                    |                                         |                                                                                                                                                                                                                                                                                                      |
|--------------------|-----------------------------------------|------------------------------------------------------------------------------------------------------------------------------------------------------------------------------------------------------------------------------------------------------------------------------------------------------|
| Physical Condition | Temperature                             | Relationship related to air or water temperature. This code must always be used whenever a physical condition relationship code is used (e.g., physical condition – species, physical condition – physical condition, flow – physical condition).                                                    |
| Physical Condition | velocity                                | Relationship related to the velocity of water in streams or rivers. This code must always be used whenever a physical condition relationship code is used (e.g., physical condition – species, physical condition – physical condition, flow – physical condition).                                  |
| Physical Condition | Width                                   | Relationship related to the cross-sectional width in a stream or river. This code must always be used whenever a physical condition relationship code is used (e.g., physical condition – species, physical condition – physical condition, flow – physical condition).                              |
| Relationship       | Flow – physical condition               | A relationship specifier that denotes relationships of the flow regime (e.g., summer base flow, peak flow) and physical conditions (e.g., temperature, sediment). This code should always be accompanied by flow and physical conditions specifier codes.                                            |
| Relationship       | Flow – species                          | A relationship specifier that denotes relationships of the flow regime (e.g., summer base flow, peak flow) and aquatic species (e.g., steelhead, FYLF). This code should always be accompanied by flow and species specifier codes, and life stage/interaction codes if possible.                    |
| Relationship       | Physical condition – physical condition | A relationship specifier that denotes relationships of physical conditions (e.g., water temperature) and other physical conditions (e.g., nutrients). This code should always be accompanied by physical condition codes.                                                                            |
| Relationship       | Physical condition – species            | A relationship specifier that denotes relationships of a physical condition (e.g., water temperature) and an aquatic species (e.g., steelhead). This code should always be accompanied by physical condition and species codes, and a life stage/interaction code if possible.                       |
| Relationship       | Species-physical condition              | A relationship specifier that denotes a species – physical condition relationships (e.g., plant photosynthesis impacting DO). This code should always be accompanied by species (e.g., steelhead) and physical condition codes.                                                                      |
| Relationship       | Species – species                       | A relationship specifier that denotes species – species relationships. This code should always be accompanied by species (e.g., steelhead) and life stage/interaction codes.                                                                                                                         |
| Species            | Algae                                   | Relationship related to aquatic algae (e.g., Cladophora, macroalgae, epiphytes, etc.). This code must always be used whenever a species relationship code is used (e.g., physical condition – species, species – species, flow – species). If possible, use a life stage/interaction specifier code. |

|         |                           |                                                                                                                                                                                                                                                                                                                                 |
|---------|---------------------------|---------------------------------------------------------------------------------------------------------------------------------------------------------------------------------------------------------------------------------------------------------------------------------------------------------------------------------|
| Species | Aquatic macroinvertebrate | Relationship related to aquatic macroinvertebrates (e.g., caddisflies, midges, mayflies, etc.). This code must always be used whenever a species relationship code is used (e.g., physical condition – species, species – species, flow – species). If possible, use a life stage/interaction specifier code.                   |
| Species | Aquatic snail             | Relationship related to an aquatic snail. This code must always be used whenever a species relationship code is used (e.g., physical condition – species, species – species, flow – species). If possible, use a life stage/interaction specifier code.                                                                         |
| Species | Bull Frog                 | Relationship related to the invasive bullfrog. This code must always be used whenever a species relationship code is used (e.g., physical condition – species, species – species, flow – species). If possible, use a life stage/interaction specifier code.                                                                    |
| Species | Chinook                   | Relationship related to Chinook salmon. This code must always be used whenever a species relationship code is used (e.g., physical condition – species, species – species, flow – species). If possible, use a life stage/interaction specifier code.                                                                           |
| Species | Coho                      | Relationship related to Coho salmon. This code must always be used whenever a species relationship code is used (e.g., physical condition – species, species – species, flow – species). If possible, use a life stage/interaction specifier code.                                                                              |
| Species | Cyanobacteria             | Relationship related to the production of toxic cyanobacteria from aquatic algae. Always use with the Algae code. This code must always be used whenever a species relationship code is used (e.g., physical condition – species, species – species, flow – species). If possible, use a life stage/interaction specifier code. |
| Species | FYLF                      | Relationship related to the Foothill Yellow Legged Frog. This code must always be used whenever a species relationship code is used (e.g., physical condition – species, species – species, flow – species). If possible, use a life stage/interaction specifier code.                                                          |
| Species | Lamprey                   | Relationship related to the Pacific Lamprey. This code must always be used whenever a species relationship code is used (e.g., physical condition – species, species – species, flow – species). If possible, use a life stage/interaction specifier code.                                                                      |
| Species | Mussel                    | Relationship related to aquatic mussels. This code must always be used whenever a species relationship code is used (e.g., physical condition – species, species – species, flow – species). If possible, use a life stage/interaction specifier code.                                                                          |

|         |                   |                                                                                                                                                                                                                                                                                                     |
|---------|-------------------|-----------------------------------------------------------------------------------------------------------------------------------------------------------------------------------------------------------------------------------------------------------------------------------------------------|
| Species | Native misc. fish | Relationship related to miscellaneous native fish (i.e., Roach). This code must always be used whenever a species relationship code is used (e.g., physical condition – species, species – species, flow – species). If possible, use a life stage/interaction specifier code.                      |
| Species | Pacific tree frog | Relationship related to the Pacific Tree Frog. This code must always be used whenever a species relationship code is used (e.g., physical condition – species, species – species, flow – species). If possible, use a life stage/interaction specifier code.                                        |
| Species | Pikeminnow        | Relationship related to the non-native Sacramento pikeminnow. This code must always be used whenever a species relationship code is used (e.g., physical condition – species, species – species, flow – species). If possible, use a life stage/interaction specifier code.                         |
| Species | Salamander        | Relationship related to native aquatic salamanders. This code must always be used whenever a species relationship code is used (e.g., physical condition – species, species – species, flow – species). If possible, use a life stage/interaction specifier code.                                   |
| Species | Sculpin           | Relationship related to sculpin. This code must always be used whenever a species relationship code is used (e.g., physical condition – species, species – species, flow – species). If possible, use a life stage/interaction specifier code.                                                      |
| Species | Steelhead         | Relationship related to steelhead trout. This code must always be used whenever a species relationship code is used (e.g., physical condition – species, species – species, flow – species). If possible, use a life stage/interaction specifier code.                                              |
| Species | Terrestrial Macro | Relationship related to terrestrial macroinvertebrates (e.g., grasshoppers). This code must always be used whenever a species relationship code is used (e.g., physical condition – species, species – species, flow – species). If possible, use a life stage/interaction specifier code.          |
| Species | Vegetation        | Relationship related to aquatic or riparian vegetation (e.g., Sedge, willows, Alder). This code must always be used whenever a species relationship code is used (e.g., physical condition – species, species – species, flow – species). If possible, use a life stage/interaction specifier code. |

# BAYESIAN NETWORK MODEL NODE STATES AND CONDITIONAL PROBABILITIES

## Node States

**Table S3.** Bayesian network model node states

| Variable                          | States | Metric                                                 | Source                                                                                                                                            |
|-----------------------------------|--------|--------------------------------------------------------|---------------------------------------------------------------------------------------------------------------------------------------------------|
| Peak flow                         | Low    | < bankfull Q                                           | Taken direct from Power et al. (2008) [Unique_ID 68]                                                                                              |
|                                   | High   | ≥ bankfull Q                                           |                                                                                                                                                   |
| Algae bloom                       | Large  | length ≥ 50 cm                                         | Taken direct from Power et al. (2008) [Unique_ID 68]                                                                                              |
|                                   | Small  | length < 50 cm                                         |                                                                                                                                                   |
| Fine sediment                     | Low    | ≤ 40% embeddedness                                     | States (low, high) and ranges (%) subjectively denoted by author using empirical values in Suttle et al. (2004) as a reference [Unique_ID 75]     |
|                                   | High   | 41-100% embeddedness                                   |                                                                                                                                                   |
| Fish growth                       | Low    | ≤ .14 mm/d                                             | States (low, high) and ranges (mm/d) subjectively denoted by author using empirical values in Suttle et al. (2004) as a reference. [Unique_ID 75] |
|                                   | High   | ≥0.15 mm/d                                             |                                                                                                                                                   |
| Dry-season baseflow               | Low    | ≤ 7Q10 flow                                            | Common low flow statistic used by USGS. Annual 7-day minimum flow with a recurrence interval of 10 years                                          |
|                                   | High   | > 7Q10 flow                                            |                                                                                                                                                   |
| Temperature (ADM)                 | Low    | <23 C                                                  | Taken direct from Schaaf et al (2017) [Unique_ID 71], who noted that 23C is a threshold for blackspot infection                                   |
|                                   | High   | ≥23 C                                                  |                                                                                                                                                   |
| Diseased individuals (proportion) | Low    | <50%                                                   | Taken direct from Schaaf et al (2017) [Unique_ID 71], who noted reported infection in terms of "50%" infected                                     |
|                                   | High   | ≥50%                                                   |                                                                                                                                                   |
| Longitudinal connectivity         | Low    | ≥ 50% pools isolated                                   | Authors' judgement                                                                                                                                |
|                                   | High   | < 50% pools isolated                                   |                                                                                                                                                   |
| Food supply                       | High   | Vulnerable insect abundance > armored insect abundance | Conceptually based on Power et al (2008) [Unique_ID 70] and Marks et al (2000) [Unique_ID 55]                                                     |
|                                   | Low    | Vulnerable insect abundance < armored insect abundance |                                                                                                                                                   |
| Juvenile Steelhead condition      | Good   | Non-negative population growth rate                    | Authors' judgement                                                                                                                                |
|                                   | Poor   | Negative population growth rate                        |                                                                                                                                                   |

## Hydrologic Nodes

**Table S4.** Conditional probability table for the Peak Flow node, Moderate hydrologic conditions

| Peak Flow |      | Source                | Justification                                                                                                                                                                                          |
|-----------|------|-----------------------|--------------------------------------------------------------------------------------------------------------------------------------------------------------------------------------------------------|
| Low       | High | Hydrologic statistics | For any given year, the probability of reaching bankfull based on a recurrence interval of 1.5 years is 1/1.5 yrs., or 0.67 (round to 0.7). The probability of not reaching bankfull is 1- 0.7, or 0.3 |
| 0.3       | 0.7  |                       |                                                                                                                                                                                                        |

**Table S5.** Conditional probability table for the Dry-season Baseflow node, Moderate hydrologic conditions

| Dry-season Baseflow |      | Source                | Justification                                                                                                  |
|---------------------|------|-----------------------|----------------------------------------------------------------------------------------------------------------|
| Low                 | High | Hydrologic statistics | For any given year, the probability of reaching the 7-day, 2-year low flow volume is equal to 1/2 yrs., or 0.5 |
| 0.5                 | 0.5  |                       |                                                                                                                |

**Table S6.** Conditional probability table for the Peak Flow node, Wet - Dry hydrologic conditions

| Peak Flow |      | Source             | Justification                                                                                                                                   |
|-----------|------|--------------------|-------------------------------------------------------------------------------------------------------------------------------------------------|
| Low       | High | Authors' judgement | Wet-Dry conditions occur when a wet winter (peak flow $\geq$ bankfull flow) is followed by a dry summer ( $\leq$ 7-day, 2-year low flow volume) |
| 0.05      | 0.95 |                    |                                                                                                                                                 |

**Table S7.** Conditional probability table for the Dry-season Baseflow node, Wet - Dry hydrologic conditions

| Dry-season Baseflow |      | Source             | Justification                                                                                                                                   |
|---------------------|------|--------------------|-------------------------------------------------------------------------------------------------------------------------------------------------|
| Low                 | High | Authors' judgement | Wet-Dry conditions occur when a wet winter (peak flow $\geq$ bankfull flow) is followed by a dry summer ( $\leq$ 7-day, 2-year low flow volume) |
| 0.95                | 0.05 |                    |                                                                                                                                                 |

**Table S8.** Conditional probability table for the Peak Flow node, Dry hydrologic conditions

| Peak Flow |      | Source             | Justification                                                                                                                            |
|-----------|------|--------------------|------------------------------------------------------------------------------------------------------------------------------------------|
| Low       | High | Authors' judgement | Dry conditions occur when a dry winter (peak flow $<$ bankfull flow) is followed by a dry summer ( $\leq$ 7-day, 2-year low flow volume) |
| 0.95      | 0.05 |                    |                                                                                                                                          |

**Table S9.** Conditional probability table for the Dry-season Baseflow node, Dry hydrologic conditions

| Dry-season Baseflow |      | Source             | Justification                                                                                                                            |
|---------------------|------|--------------------|------------------------------------------------------------------------------------------------------------------------------------------|
| Low                 | High | Authors' judgement | Dry conditions occur when a dry winter (peak flow $<$ bankfull flow) is followed by a dry summer ( $\leq$ 7-day, 2-year low flow volume) |
| 0.95                | 0.05 |                    |                                                                                                                                          |

**Table S10.** Conditional probability table for the Peak Flow node, Wet hydrologic conditions

| <b>Peak Flow</b> |      | <b>Source</b>      | <b>Justification</b>                                                                                                                 |
|------------------|------|--------------------|--------------------------------------------------------------------------------------------------------------------------------------|
| Low              | High | Authors' judgement | Wet conditions occur when a wet winter (peak flow $\geq$ bankfull flow) is followed by a wet summer (>7-day, 2-year low flow volume) |
| 0.05             | 0.95 |                    |                                                                                                                                      |

**Table S11.** Conditional probability table for the Dry-season Baseflow node, Wet hydrologic conditions

| <b>Dry-season Baseflow</b> |      | <b>Source</b>      | <b>Justification</b>                                                                                                                 |
|----------------------------|------|--------------------|--------------------------------------------------------------------------------------------------------------------------------------|
| Low                        | High | Authors' judgement | Wet conditions occur when a wet winter (peak flow $\geq$ bankfull flow) is followed by a wet summer (>7-day, 2-year low flow volume) |
| 0.05                       | 0.95 |                    |                                                                                                                                      |



## Base Conditional Probability Tables

### Base Middle Nodes

**Table S12.** Conditional probability table (base) for the Algae Bloom node

| Peak flow | Algae Bloom |       | Source              | Justification                                                                                     |
|-----------|-------------|-------|---------------------|---------------------------------------------------------------------------------------------------|
|           | Large       | Small |                     |                                                                                                   |
| Low       | 0.17        | 0.83  | Power et al. (2008) | Conditional probabilities taken directly from a probabilistic relationship in Power et al. (2008) |
| High      | 0.75        | 0.25  |                     |                                                                                                   |

**Table S13.** Conditional probability table (base) for the Fine Sediment node

| Peak flow | Fine Sediment |      | Source             | Justification                                                     |
|-----------|---------------|------|--------------------|-------------------------------------------------------------------|
|           | Low           | High |                    |                                                                   |
| Low       | 0.4           | 0.6  | Authors' judgement | Flows exceeding bankfull move the majority of sediment in streams |
| High      | 0.7           | 0.3  |                    |                                                                   |

**Table S14.** Conditional probability table (base) for the Temperature node

| Dry-season baseflow | Temperature (ADM) |      | Source             | Justification                                                                                                                      |
|---------------------|-------------------|------|--------------------|------------------------------------------------------------------------------------------------------------------------------------|
|                     | Low               | High |                    |                                                                                                                                    |
| Low                 | 0.3               | 0.7  | Authors' judgement | In an open and sunlight channel like the mainstem SFER, the relationship with dry-season baseflow and temperature is likely strong |
| High                | 0.7               | 0.3  |                    |                                                                                                                                    |

**Table S15.** Conditional probability table (base) for the Longitudinal Connectivity node

| Dry-season baseflow | Longitudinal Connectivity |      | Source             | Justification                                                                    |
|---------------------|---------------------------|------|--------------------|----------------------------------------------------------------------------------|
|                     | Low                       | High |                    |                                                                                  |
| Low                 | 0.65                      | 0.35 | Authors' judgement | In the SFER, pools are known to isolate in dry years when summer baseflow is low |
| High                | 0.3                       | 0.7  |                    |                                                                                  |

**Table S16.** Conditional probability table (base) for the Diseased Individuals node

| Temp. (ADM) | Diseased Individuals (proportion) |      | Source                | Justification                                                                                                                                         |
|-------------|-----------------------------------|------|-----------------------|-------------------------------------------------------------------------------------------------------------------------------------------------------|
|             | Low                               | High |                       |                                                                                                                                                       |
| Low         | 0.7                               | 0.3  | Schaaf et al., (2017) | Conditional probabilities estimated from a relationship in Schaaf et al (2017), who stated that at temperatures > 23C, 50% of fish would be infected. |
| High        | 0.2                               | 0.8  |                       |                                                                                                                                                       |

**Table S17.** Conditional probability table (base) for the Fish Growth node

| Fine Sediment | Fish Growth |      | Source               | Justification                                                                                                                |
|---------------|-------------|------|----------------------|------------------------------------------------------------------------------------------------------------------------------|
|               | Low         | High |                      |                                                                                                                              |
| Low           | 0.2         | 0.8  | Suttle et al. (2004) | Conditional probabilities estimated using a negative linear relationship between fine sediment embeddedness and fish growth. |
| High          | 0.8         | 0.2  |                      |                                                                                                                              |

**Table S18.** Conditional probability table (base) for the Food Supply node

| Algae Bloom | Food Supply |     | Source                                      | Justification                                                                                                                                                                                                                                                 |
|-------------|-------------|-----|---------------------------------------------|---------------------------------------------------------------------------------------------------------------------------------------------------------------------------------------------------------------------------------------------------------------|
|             | High        | Low |                                             |                                                                                                                                                                                                                                                               |
| Large       | 0.6         | 0.4 | Power et al. (2008) and Marks et al. (2000) | Conditional probabilities estimated from observational data, which state that the trophic levels are higher in flood years as more algal energy is directed towards vulnerable taxa (e.g., mayflies, macroinvertebrate predators) instead of armored grazers. |
| Small       | 0.4         | 0.6 |                                             |                                                                                                                                                                                                                                                               |

Base End Node

**Table S19.** Conditional probability table (base) for the Juvenile Steelhead Condition node

| Food supply | Fish growth | Long. connectivity | Diseased individuals | Juvenile Steelhead Condition |      | Source             | Justification                                                                                                                                                                                                                                                                        |
|-------------|-------------|--------------------|----------------------|------------------------------|------|--------------------|--------------------------------------------------------------------------------------------------------------------------------------------------------------------------------------------------------------------------------------------------------------------------------------|
|             |             |                    |                      | Good                         | Poor |                    |                                                                                                                                                                                                                                                                                      |
| High        | Low         | Low                | Low                  | 0.5                          | 0.5  | Authors' judgement | 4/4 desirable is 0.5 good, 3/4 desirable is 0.7 good, 2/4 desirable is 0.5 good, 1/4 desirable is 0.2 good, 0/4 desirable is 0.15 good.<br><br>Desirable conditions include "high" food supply, "high" fish growth, "high" longitudinal connectivity, and "low" diseased individuals |
| High        | Low         | Low                | High                 | 0.2                          | 0.8  |                    |                                                                                                                                                                                                                                                                                      |
| High        | Low         | High               | Low                  | 0.7                          | 0.3  |                    |                                                                                                                                                                                                                                                                                      |
| High        | Low         | High               | High                 | 0.5                          | 0.5  |                    |                                                                                                                                                                                                                                                                                      |
| High        | High        | Low                | Low                  | 0.7                          | 0.3  |                    |                                                                                                                                                                                                                                                                                      |
| High        | High        | Low                | High                 | 0.5                          | 0.5  |                    |                                                                                                                                                                                                                                                                                      |
| High        | High        | High               | Low                  | 0.8                          | 0.2  |                    |                                                                                                                                                                                                                                                                                      |
| High        | High        | High               | High                 | 0.7                          | 0.3  |                    |                                                                                                                                                                                                                                                                                      |
| Low         | Low         | Low                | Low                  | 0.2                          | 0.8  |                    |                                                                                                                                                                                                                                                                                      |
| Low         | Low         | Low                | High                 | 0.15                         | 0.85 |                    |                                                                                                                                                                                                                                                                                      |
| Low         | Low         | High               | Low                  | 0.5                          | 0.5  |                    |                                                                                                                                                                                                                                                                                      |
| Low         | Low         | High               | High                 | 0.2                          | 0.8  |                    |                                                                                                                                                                                                                                                                                      |
| Low         | High        | Low                | Low                  | 0.5                          | 0.5  |                    |                                                                                                                                                                                                                                                                                      |
| Low         | High        | Low                | High                 | 0.2                          | 0.8  |                    |                                                                                                                                                                                                                                                                                      |
| Low         | High        | High               | Low                  | 0.7                          | 0.3  |                    |                                                                                                                                                                                                                                                                                      |
| Low         | High        | High               | High                 | 0.5                          | 0.5  |                    |                                                                                                                                                                                                                                                                                      |

## Scenario A Conditional Probabilities

Conditional probability tables for Middle and End nodes and their associated conditional probability ranges for Scenario A. The probability range denotes the lower and upper limits for random probability generation (30 samples with replacement) and the shading denotes the probability being manipulated.

### Middle Nodes

**Table S20.** Conditional probability ranges (Scenario A) for the Fine Sediment node

| Peak flow | Fine Sediment |      | Probability Range |       |
|-----------|---------------|------|-------------------|-------|
|           | Low           | High | Lower             | Upper |
| Low       | 0.4           | 0.6  | 0.55              | 0.75  |
| High      | 0.7           | 0.3  | 0.65              | 0.8   |

**Table S21.** Conditional probability ranges (Scenario A) for the Temperature node

| Dry-season baseflow | Temperature (ADM) |      | Probability Range |       |
|---------------------|-------------------|------|-------------------|-------|
|                     | Low               | High | Lower             | Upper |
| Low                 | 0.3               | 0.7  | 0.65              | 0.85  |
| High                | 0.7               | 0.3  | 0.6               | 0.8   |

**Table S22.** Conditional probability ranges (Scenario A) for the Longitudinal Connectivity node

| Dry-season baseflow | Longitudinal Connectivity |      | Probability Range |       |
|---------------------|---------------------------|------|-------------------|-------|
|                     | Low                       | High | Lower             | Upper |
| Low                 | 0.65                      | 0.35 | 0.6               | 0.8   |
| High                | 0.3                       | 0.7  | 0.6               | 0.75  |

**Table S23.** Conditional probability ranges (Scenario A) for the Diseased Individuals node

| Temperature (ADM) | Diseased Individuals (proportion) |      | Probability Range |       |
|-------------------|-----------------------------------|------|-------------------|-------|
|                   | Low                               | High | Lower             | Upper |
| Low               | 0.7                               | 0.3  | 0.7               | 0.85  |
| High              | 0.2                               | 0.8  | 0.7               | 0.85  |

**Table S24.** Conditional probability ranges (Scenario A) for the Fish Growth node

| Fine Sediment | Fish Growth |      | Probability Range |       |
|---------------|-------------|------|-------------------|-------|
|               | Low         | High | Lower             | Upper |
| Low           | 0.2         | 0.8  | 0.65              | 0.8   |
| High          | 0.8         | 0.2  | 0.7               | 0.85  |

**Table S25.** Conditional probability ranges (Scenario A) for the Food Supply node

| Algae Bloom | Food Supply |     | Probability Range |       |
|-------------|-------------|-----|-------------------|-------|
|             | High        | Low | Lower             | Upper |
| Large       | 0.6         | 0.4 | 0.6               | 0.8   |
| Small       | 0.4         | 0.6 | 0.55              | 0.75  |

End Node

**Table S26.** Conditional probability ranges (Scenario A) for the Juvenile Steelhead Condition node

| Food supply | Fish growth | Long. connectivity | Diseased individuals | Juvenile Steelhead Condition |      | Probability Range |       |
|-------------|-------------|--------------------|----------------------|------------------------------|------|-------------------|-------|
|             |             |                    |                      | Good                         | Poor | Lower             | Upper |
| High        | Low         | Low                | Low                  | 0.5                          | 0.5  | 0.4               | 0.65  |
| High        | Low         | Low                | High                 | 0.2                          | 0.8  | 0.15              | 0.3   |
| High        | Low         | High               | Low                  | 0.7                          | 0.3  | 0.6               | 0.8   |
| High        | Low         | High               | High                 | 0.5                          | 0.5  | 0.4               | 0.65  |
| High        | High        | Low                | Low                  | 0.7                          | 0.3  | 0.65              | 0.8   |
| High        | High        | Low                | High                 | 0.5                          | 0.5  | 0.4               | 0.65  |
| High        | High        | High               | Low                  | 0.8                          | 0.2  | 0.7               | 0.85  |
| High        | High        | High               | High                 | 0.7                          | 0.3  | 0.65              | 0.8   |
| Low         | Low         | Low                | Low                  | 0.2                          | 0.8  | 0.15              | 0.3   |
| Low         | Low         | Low                | High                 | 0.15                         | 0.85 | 0.1               | 0.2   |
| Low         | Low         | High               | Low                  | 0.5                          | 0.5  | 0.4               | 0.65  |
| Low         | Low         | High               | High                 | 0.2                          | 0.8  | 0.15              | 0.3   |
| Low         | High        | Low                | Low                  | 0.5                          | 0.5  | 0.4               | 0.65  |
| Low         | High        | Low                | High                 | 0.2                          | 0.8  | 0.15              | 0.3   |
| Low         | High        | High               | Low                  | 0.7                          | 0.3  | 0.65              | 0.8   |
| Low         | High        | High               | High                 | 0.5                          | 0.5  | 0.4               | 0.65  |

Scenario A run in R.

**Table S27.** Conditional probability combinations for Hydrologic, Middle, and End nodes in Scenario A. Runs 1-30 used Moderate conditional probabilities for Hydrologic Nodes, Base probabilities for Middle nodes with Level 2 uncertainty, and sets of randomly generated probabilities (A1, A2, etc.) for the remaining nodes. Middle and End node combinations from Runs 1-30 were repeated three times and evaluated under Wet-Dry (Runs 31-60), Dry (Runs 61-90), and Wet (Runs 91-120) hydrologic conditions.

| Run # | Hydrologic Nodes | Middle Nodes        |                     | End Node |
|-------|------------------|---------------------|---------------------|----------|
|       |                  | Level 2 uncertainty | Level 3 uncertainty |          |
| 1     | Moderate         | Base                | A1                  | A1       |
| 2     | Moderate         | Base                | A2                  | A2       |
| 3     | Moderate         | Base                | A3                  | A3       |
| ...   | ...              | ...                 | ...                 |          |
| 29    | Moderate         | Base                | A29                 | A29      |
| 30    | Moderate         | Base                | A30                 | A30      |
| 31    | Wet-Dry          | Base                | A1                  | A1       |
| 32    | Wet-Dry          | Base                | A2                  | A2       |
| 33    | Wet-Dry          | Base                | A3                  | A3       |
| ...   | ...              | ...                 | ...                 |          |
| 59    | Wet-Dry          | Base                | A29                 | A29      |
| 60    | Wet-Dry          | Base                | A30                 | A30      |
| 61    | Dry              | Base                | A1                  | A1       |
| 62    | Dry              | Base                | A2                  | A2       |
| 63    | Dry              | Base                | A3                  | A3       |
| ...   | ...              | ...                 | ...                 | ...      |
| 89    | Dry              | Base                | A29                 | A29      |
| 90    | Dry              | Base                | A30                 | A30      |
| 91    | Wet              | Base                | A1                  | A1       |
| 92    | Wet              | Base                | A2                  | A2       |
| 93    | Wet              | Base                | A3                  | A3       |
| ...   | ...              | ...                 | ...                 | ...      |
| 119   | Wet              | Base                | A29                 | A29      |
| 120   | Wet              | Base                | A30                 | A30      |

## Scenario B Conditional Probabilities

Middle Nodes: Increased Certainty

**Table S28.** Conditional probability table (Scenario B, Middle) for the Fine Sediment node

| Peak flow | Fine Sediment |      |
|-----------|---------------|------|
|           | Low           | High |
| Low       | 0.05          | 0.95 |
| High      | 0.95          | 0.05 |

**Table S29.** Conditional probability table (Scenario B, Middle) for the Temperature node

| Dry-season baseflow | Temperature (ADM) |      |
|---------------------|-------------------|------|
|                     | Low               | High |
| Low                 | 0.05              | 0.95 |
| High                | 0.95              | 0.05 |

**Table S30.** Conditional probability table (Scenario B, Middle) for the Longitudinal Connectivity node

| Dry-season baseflow | Longitudinal Connectivity |      |
|---------------------|---------------------------|------|
|                     | Low                       | High |
| Low                 | 0.95                      | 0.05 |
| High                | 0.05                      | 0.95 |

**Table S31.** Conditional probability table (Scenario B, Middle) for the Diseased Individuals node

| Temperature (ADM) | Diseased Individuals (proportion) |      |
|-------------------|-----------------------------------|------|
|                   | Low                               | High |
| Low               | 0.95                              | 0.05 |
| High              | 0.05                              | 0.95 |

**Table S32.** Conditional probability table (Scenario B, Middle) for the Fish Growth node

| Fine Sediment | Fish Growth |      |
|---------------|-------------|------|
|               | Low         | High |
| Low           | 0.05        | 0.95 |
| High          | 0.95        | 0.05 |

**Table S33.** Conditional probability table (Scenario B, Middle) for the Food Supply node

| Algae Bloom | Food Supply |      |
|-------------|-------------|------|
|             | High        | Low  |
| Large       | 0.95        | 0.05 |
| Small       | 0.05        | 0.95 |

End Node

**Table S34.** Conditional probability table (Scenario B, E1) for the Juvenile Steelhead Condition node under assumptions that longitudinal connectivity is the limiting factor

| Food supply | Fish growth | Long. connectivity | Diseased individuals | Juvenile Steelhead Condition |      | Source             | Justification                                                                                                                                                                                                                                                                                                                                                                                                                                                   |
|-------------|-------------|--------------------|----------------------|------------------------------|------|--------------------|-----------------------------------------------------------------------------------------------------------------------------------------------------------------------------------------------------------------------------------------------------------------------------------------------------------------------------------------------------------------------------------------------------------------------------------------------------------------|
|             |             |                    |                      | Good                         | Poor |                    |                                                                                                                                                                                                                                                                                                                                                                                                                                                                 |
| High        | Low         | Low                | Low                  | 0.20                         | 0.80 | Authors' judgement | If longitudinal connectivity is "desirable" (i.e., high), there is a 70% likelihood of "good" juvenile steelhead conditions, even if other variables are undesirable. If long. connectivity is desirable (high) and 2 or more other variables are desirable, the likelihood of "good" juvenile steelhead condition increases to 80%. If long. connectivity is low (even if other variables are desirable), the likelihood of "good" steelhead condition is 20%. |
| High        | Low         | Low                | High                 | 0.20                         | 0.80 |                    |                                                                                                                                                                                                                                                                                                                                                                                                                                                                 |
| High        | Low         | High               | Low                  | 0.80                         | 0.20 |                    |                                                                                                                                                                                                                                                                                                                                                                                                                                                                 |
| High        | Low         | High               | High                 | 0.70                         | 0.30 |                    |                                                                                                                                                                                                                                                                                                                                                                                                                                                                 |
| High        | High        | Low                | Low                  | 0.20                         | 0.80 |                    |                                                                                                                                                                                                                                                                                                                                                                                                                                                                 |
| High        | High        | Low                | High                 | 0.20                         | 0.80 |                    |                                                                                                                                                                                                                                                                                                                                                                                                                                                                 |
| High        | High        | High               | Low                  | 0.80                         | 0.20 |                    |                                                                                                                                                                                                                                                                                                                                                                                                                                                                 |
| High        | High        | High               | High                 | 0.80                         | 0.20 |                    |                                                                                                                                                                                                                                                                                                                                                                                                                                                                 |
| Low         | Low         | Low                | Low                  | 0.20                         | 0.80 |                    |                                                                                                                                                                                                                                                                                                                                                                                                                                                                 |
| Low         | Low         | Low                | High                 | 0.20                         | 0.80 |                    |                                                                                                                                                                                                                                                                                                                                                                                                                                                                 |
| Low         | Low         | High               | Low                  | 0.70                         | 0.30 |                    |                                                                                                                                                                                                                                                                                                                                                                                                                                                                 |
| Low         | Low         | High               | High                 | 0.70                         | 0.30 |                    |                                                                                                                                                                                                                                                                                                                                                                                                                                                                 |
| Low         | High        | Low                | Low                  | 0.20                         | 0.80 |                    |                                                                                                                                                                                                                                                                                                                                                                                                                                                                 |
| Low         | High        | Low                | High                 | 0.20                         | 0.80 |                    |                                                                                                                                                                                                                                                                                                                                                                                                                                                                 |
| Low         | High        | High               | Low                  | 0.80                         | 0.20 |                    |                                                                                                                                                                                                                                                                                                                                                                                                                                                                 |
| Low         | High        | High               | High                 | 0.70                         | 0.30 |                    |                                                                                                                                                                                                                                                                                                                                                                                                                                                                 |

**Table S35.** Conditional probability table (Scenario B, E2) for the Juvenile Steelhead Condition node under assumptions that food supply and fish growth are the limiting factors

| Food supply | Fish growth | Long. connectivity | Diseased individuals | Juvenile Steelhead Condition |      | Source             | Justification                                                                                                                                                                                                                                                                                                                                                                                                                                                                                                                                                                                  |
|-------------|-------------|--------------------|----------------------|------------------------------|------|--------------------|------------------------------------------------------------------------------------------------------------------------------------------------------------------------------------------------------------------------------------------------------------------------------------------------------------------------------------------------------------------------------------------------------------------------------------------------------------------------------------------------------------------------------------------------------------------------------------------------|
|             |             |                    |                      | Good                         | Poor |                    |                                                                                                                                                                                                                                                                                                                                                                                                                                                                                                                                                                                                |
| High        | Low         | Low                | Low                  | 0.70                         | 0.30 | Authors' judgement | If both fish growth and food supply are desirable (i.e., high), the likelihood of "good" steelhead condition is 80%. If only one out of the two (fish growth or food supply) are desirable and one or more other condition are desirable, the likelihood of "good" steelhead condition is 70%. If only one of fish growth or food supply are desirable, and no other conditions are desirable, the likelihood of a good steelhead outcome is 60%. If food supply and fish growth are undesirable (even if other variables are desirable), the likelihood of "good" steelhead condition is 30%. |
| High        | Low         | Low                | High                 | 0.60                         | 0.40 |                    |                                                                                                                                                                                                                                                                                                                                                                                                                                                                                                                                                                                                |
| High        | Low         | High               | Low                  | 0.70                         | 0.30 |                    |                                                                                                                                                                                                                                                                                                                                                                                                                                                                                                                                                                                                |
| High        | Low         | High               | High                 | 0.70                         | 0.30 |                    |                                                                                                                                                                                                                                                                                                                                                                                                                                                                                                                                                                                                |
| High        | High        | Low                | Low                  | 0.80                         | 0.20 |                    |                                                                                                                                                                                                                                                                                                                                                                                                                                                                                                                                                                                                |
| High        | High        | Low                | High                 | 0.80                         | 0.20 |                    |                                                                                                                                                                                                                                                                                                                                                                                                                                                                                                                                                                                                |
| High        | High        | High               | Low                  | 0.80                         | 0.20 |                    |                                                                                                                                                                                                                                                                                                                                                                                                                                                                                                                                                                                                |
| High        | High        | High               | High                 | 0.80                         | 0.20 |                    |                                                                                                                                                                                                                                                                                                                                                                                                                                                                                                                                                                                                |
| Low         | Low         | Low                | Low                  | 0.30                         | 0.70 |                    |                                                                                                                                                                                                                                                                                                                                                                                                                                                                                                                                                                                                |
| Low         | Low         | Low                | High                 | 0.30                         | 0.70 |                    |                                                                                                                                                                                                                                                                                                                                                                                                                                                                                                                                                                                                |
| Low         | Low         | High               | Low                  | 0.30                         | 0.70 |                    |                                                                                                                                                                                                                                                                                                                                                                                                                                                                                                                                                                                                |
| Low         | Low         | High               | High                 | 0.30                         | 0.70 |                    |                                                                                                                                                                                                                                                                                                                                                                                                                                                                                                                                                                                                |
| Low         | High        | Low                | Low                  | 0.70                         | 0.30 |                    |                                                                                                                                                                                                                                                                                                                                                                                                                                                                                                                                                                                                |
| Low         | High        | Low                | High                 | 0.60                         | 0.40 |                    |                                                                                                                                                                                                                                                                                                                                                                                                                                                                                                                                                                                                |
| Low         | High        | High               | Low                  | 0.70                         | 0.30 |                    |                                                                                                                                                                                                                                                                                                                                                                                                                                                                                                                                                                                                |
| Low         | High        | High               | High                 | 0.70                         | 0.30 |                    |                                                                                                                                                                                                                                                                                                                                                                                                                                                                                                                                                                                                |



**Table S36.** Conditional probability table (Scenario B, E3) for the Juvenile Steelhead Condition node under assumptions that Disease is the limiting factor

| Food supply | Fish growth | Long. connectivity | Diseased individuals | Juvenile Steelhead Condition |      | Source             | Justification                                                                                                                                                                                                                                                                                                                                                                                                       |
|-------------|-------------|--------------------|----------------------|------------------------------|------|--------------------|---------------------------------------------------------------------------------------------------------------------------------------------------------------------------------------------------------------------------------------------------------------------------------------------------------------------------------------------------------------------------------------------------------------------|
|             |             |                    |                      | Good                         | Poor |                    |                                                                                                                                                                                                                                                                                                                                                                                                                     |
| High        | Low         | Low                | Low                  | 0.70                         | 0.30 | Authors' judgement | If disease is desirable (i.e., low), there is a 70% likelihood of "good" juvenile steelhead conditions, even if other variables are undesirable. If disease is desirable (low) and 2 or more variables are desirable, the likelihood of "good" steelhead condition increases to 80%. If disease is undesirable (high), the likelihood of "good" steelhead condition is 30% (even if other variables are desirable). |
| High        | Low         | Low                | High                 | 0.30                         | 0.70 |                    |                                                                                                                                                                                                                                                                                                                                                                                                                     |
| High        | Low         | High               | Low                  | 0.80                         | 0.20 |                    |                                                                                                                                                                                                                                                                                                                                                                                                                     |
| High        | Low         | High               | High                 | 0.30                         | 0.70 |                    |                                                                                                                                                                                                                                                                                                                                                                                                                     |
| High        | High        | Low                | Low                  | 0.80                         | 0.20 |                    |                                                                                                                                                                                                                                                                                                                                                                                                                     |
| High        | High        | Low                | High                 | 0.30                         | 0.70 |                    |                                                                                                                                                                                                                                                                                                                                                                                                                     |
| High        | High        | High               | Low                  | 0.80                         | 0.20 |                    |                                                                                                                                                                                                                                                                                                                                                                                                                     |
| High        | High        | High               | High                 | 0.30                         | 0.70 |                    |                                                                                                                                                                                                                                                                                                                                                                                                                     |
| Low         | Low         | Low                | Low                  | 0.70                         | 0.30 |                    |                                                                                                                                                                                                                                                                                                                                                                                                                     |
| Low         | Low         | Low                | High                 | 0.30                         | 0.70 |                    |                                                                                                                                                                                                                                                                                                                                                                                                                     |
| Low         | Low         | High               | Low                  | 0.70                         | 0.30 |                    |                                                                                                                                                                                                                                                                                                                                                                                                                     |
| Low         | Low         | High               | High                 | 0.30                         | 0.70 |                    |                                                                                                                                                                                                                                                                                                                                                                                                                     |
| Low         | High        | Low                | Low                  | 0.70                         | 0.30 |                    |                                                                                                                                                                                                                                                                                                                                                                                                                     |
| Low         | High        | Low                | High                 | 0.30                         | 0.70 |                    |                                                                                                                                                                                                                                                                                                                                                                                                                     |
| Low         | High        | High               | Low                  | 0.80                         | 0.20 |                    |                                                                                                                                                                                                                                                                                                                                                                                                                     |
| Low         | High        | High               | High                 | 0.30                         | 0.70 |                    |                                                                                                                                                                                                                                                                                                                                                                                                                     |

Scenario B runs in R

**Table S37.** Scenario B probability combinations

| Run # | Hydrologic Nodes | Middle Nodes        |                     | End Node |
|-------|------------------|---------------------|---------------------|----------|
|       |                  | Level 2 uncertainty | Level 3 uncertainty |          |
| 1     | Moderate         | Base                | Base                | Base     |
| 2     | Wet-Dry          | Base                | Base                | Base     |
| 3     | Dry              | Base                | Base                | Base     |
| 4     | Wet              | Base                | Base                | Base     |
| 5     | Moderate         | Base                | Increased certainty | Base     |
| 6     | Wet-Dry          | Base                | Increased certainty | Base     |
| 7     | Dry              | Base                | Increased certainty | Base     |
| 8     | Wet              | Base                | Increased certainty | Base     |
| 9     | Moderate         | Base                | Base                | E1       |
| 10    | Wet-Dry          | Base                | Base                | E1       |
| 11    | Dry              | Base                | Base                | E1       |
| 12    | Wet              | Base                | Base                | E1       |
| 13    | Moderate         | Base                | Base                | E2       |
| 14    | Wet-Dry          | Base                | Base                | E2       |
| 15    | Dry              | Base                | Base                | E2       |
| 16    | Wet              | Base                | Base                | E2       |
| 17    | Moderate         | Base                | Base                | E3       |
| 18    | Wet-Dry          | Base                | Base                | E3       |
| 19    | Dry              | Base                | Base                | E3       |
| 20    | Wet              | Base                | Base                | E3       |
| 21    | Moderate         | Base                | Increased certainty | E1       |
| 22    | Wet-Dry          | Base                | Increased certainty | E1       |
| 23    | Dry              | Base                | Increased certainty | E1       |
| 24    | Wet              | Base                | Increased certainty | E1       |
| 25    | Moderate         | Base                | Increased certainty | E2       |
| 26    | Wet-Dry          | Base                | Increased certainty | E2       |
| 27    | Dry              | Base                | Increased certainty | E2       |
| 28    | Wet              | Base                | Increased certainty | E2       |
| 29    | Moderate         | Base                | Increased certainty | E3       |
| 30    | Wet-Dry          | Base                | Increased certainty | E3       |
| 31    | Dry              | Base                | Increased certainty | E3       |
| 32    | Wet              | Base                | Increased certainty | E3       |
